# Supplementary material for: Concise synthesis of a light/temperature/pH/CO2-quadruple responsive azobenzene functionalized homopolymer for reversible photopatterning
Source: Royal Society of Chemistry journal article supplement (doi:10.1039/d4py00669k), 2024-01-01
Supplement: d4py00669k1.pdf [file d4py00669k1.pdf]

***Supporting Information for***

**Concise Synthesis of Light/Temperature/pH/CO<sub>2</sub>-Quadruple Responsive  
Azobenzene Functionalized Homopolymer for Reversible Photopatterning**

Ke Wang<sup>a,\*</sup>, Meiyu Si<sup>a</sup>, Xiaofang Liu<sup>a</sup>, Zilong Wang<sup>a</sup>, Guiyan Liu<sup>a</sup>, Yongfei Zeng<sup>a,\*</sup>

<sup>a</sup> Tianjin Key Laboratory of Structure and Performance for Functional Molecules, College of Chemistry, Tianjin Normal University, Tianjin, 300387, China. E-mail: [kewang@tjnu.edu.cn](mailto:kewang@tjnu.edu.cn), [yfzeng@nankai.edu.cn](mailto:yfzeng@nankai.edu.cn).

†Electronic Supplementary Information (ESI) available. See DOI: 10.1016/x0xx00000.

**Characterization**

NMR spectrum were performed on Bruker Avance III 400MHz Nuclear Magnetic Resonance Spectrometer. FTIR spectrum were measured by a Nicolet IR200 FT-IR spectrometer. An Agilent PL-GPC50 instrument was used to carry out molecular weight and polydispersity index (eluent: THF; standard sample: polystyrene; chromatographic column: PLMIXED-C, 5 μm, 7.5 × 50 mm; detector: differential refraction detector; flow rate: 1.0 mL/min). The UCST, LCST and UV/vis absorption spectrum were tested on a UH-4150 UV-vis spectrophotometer. TEM was observed by a FEI TECNAI G2 F20 (accelerating voltage: 200 kV). NanoBrook Omni laser light scattering spectrometer was used to the analysis of dynamic light scattering (DLS). Intensity of 365 nm UV lamp: 90 W/cm<sup>2</sup>, intensity of 430 nm blue light lamp: 30 W/cm<sup>2</sup>.

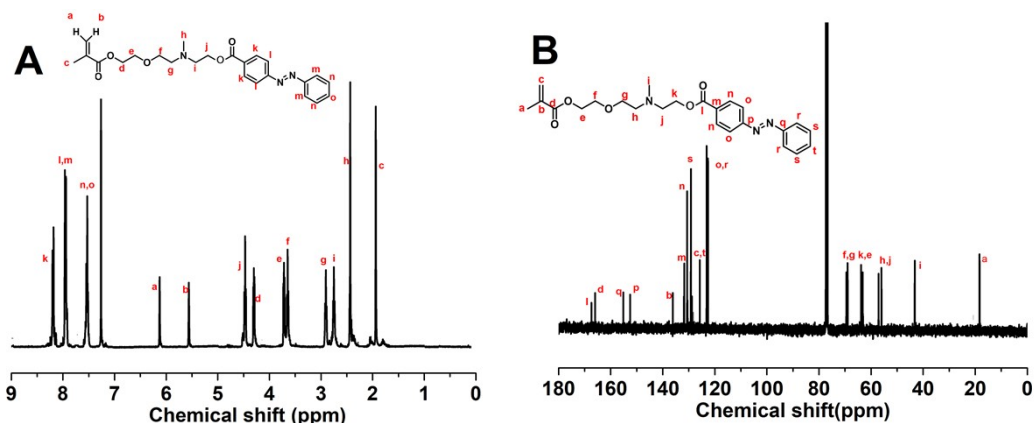

**Figure S1.** The  $^1\text{H}$  NMR spectra (A) and  $^{13}\text{C}$  NMR spectra (B) of Azo-N-EOMA in  $\text{CDCl}_3$ .

(E)-2-((2-(2-(methacryloyloxy) ethoxy)ethyl) (methylamino)ethyl 4-(phenyldiazenyl)benzoate (Azo-N-EOMA) (78%).  $^1\text{H}$  NMR (400 MHz,  $\text{CDCl}_3$ )  $\delta$  8.22 - 8.15 (d,  $J = 8.4$  Hz, 2H) , 7.95 (dd,  $J = 8.2, 1.7$  Hz, 4H), 7.55 - 7.50 (m, 3H), 6.12(s, 1H), 5.58 - 5.53 (m, 1H), 4.46 (t,  $J = 5.9$  Hz, 2H), 4.29 (t,  $J = 5.8$  Hz, 2H), 3.74 - 3.69 (m, 2H), 3.64 (t,  $J = 5.6$  Hz, 2H), 2.89 (t,  $J = 5.7$  Hz, 2H), 2.75 (t,  $J = 5.7$  Hz, 2H), 2.42 (s, 3H), 1.94 (s, 3H).  $^{13}\text{C}$  NMR (101 MHz,  $\text{CDCl}_3$ )  $\delta$  167.4, 166.0, 155.1, 152.7, 136.1, 131.8, 130.6, 129.2, 125.2, 123.1, 122.8, 69.5, 69.1, 63.8, 63.2, 57.2, 56.0, 43.2, 18.2.

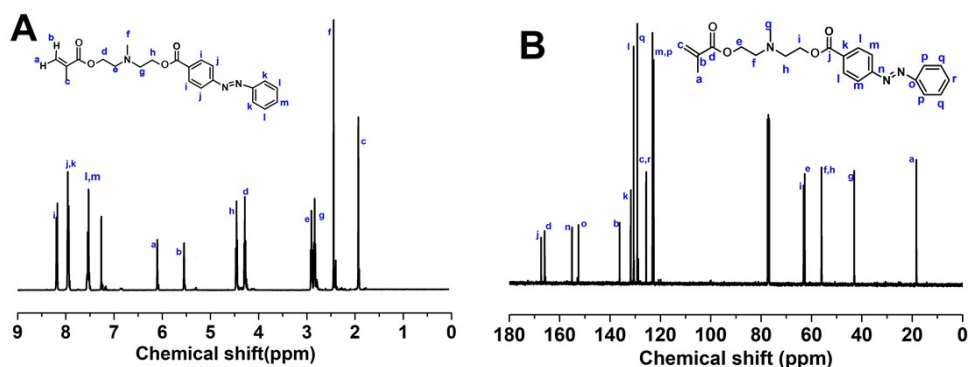

**Figure S2.** The  $^1\text{H}$  NMR spectra (A) and  $^{13}\text{C}$  NMR spectra (B) of Azo-N-MA in  $\text{CDCl}_3$ .

(E)-2-((2-(2-(methacryloyloxy) ethyl) (methylamino)ethyl 4-(phenyldiazenyl)benzoate (Azo-N-MA) (83%).  $^1\text{H}$  NMR (400 MHz,  $\text{CDCl}_3$ )  $\delta$  8.22 -

8.15 (d,  $J = 8.6$  Hz, 2H) , 7.95(dd,  $J = 8.2, 1.7$  Hz, 4H), 7.55 - 7.50 (m, 3H), 6.12(s, 1H), 5.58 - 5.53 (m, 1H), 4.46 (t,  $J=5.8$  Hz, 2H), 4.29 (t,  $J = 5.8$  Hz, 2H), 2.89 (t,  $J=5.8$  Hz, 2H), 2.75 (t,  $J= 5.8$  Hz, 2H), 2.42 (s, 3H), 1.94 (s, 3H).  $^{13}\text{C}$  NMR (101 MHz,  $\text{CDCl}_3$ )  $\delta$ 167.2, 165.9, 155.2, 152.7, 136.0, 132.3, 130.9, 129.2, 125.5, 123.0, 122.9, 62.9, 62.2, 56.1, 56.0, 43.1, 18.3.

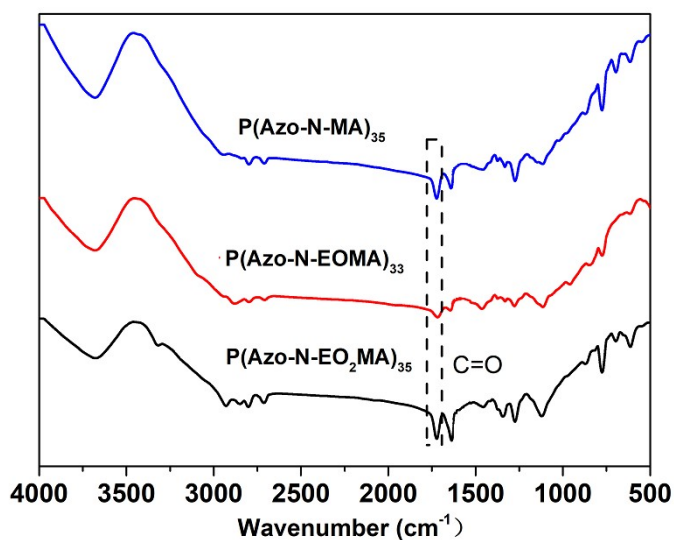

**Figure S3.** The FT-IR spectra of  $\text{P}(\text{Azo-N-EO}_2\text{MA})_{35}$ ,  $\text{P}(\text{Azo-N-EOMA})_{33}$  and  $\text{P}(\text{Azo-N-MA})_{35}$ .

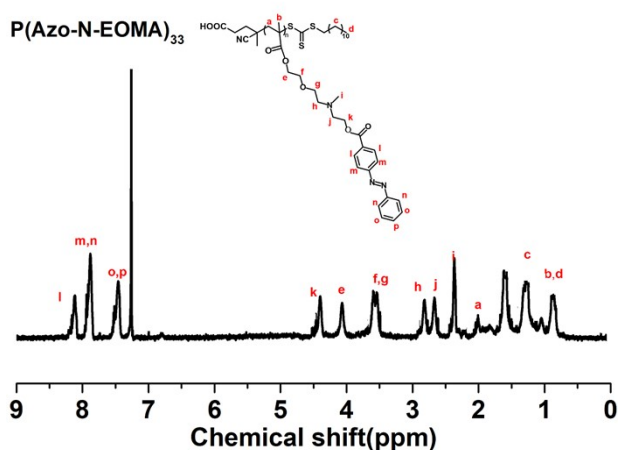

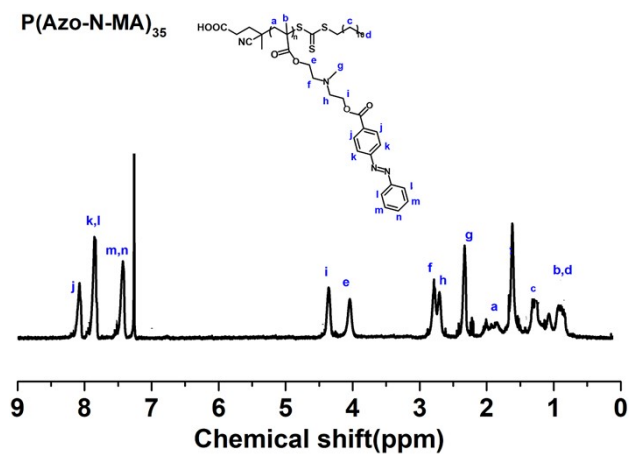

**Figure S4.** The  $^1\text{H}$  NMR spectra of  $\text{P}(\text{Azo-N-EO}_2\text{MA})_{33}$  and  $\text{P}(\text{Azo-N-MA})_{35}$ .

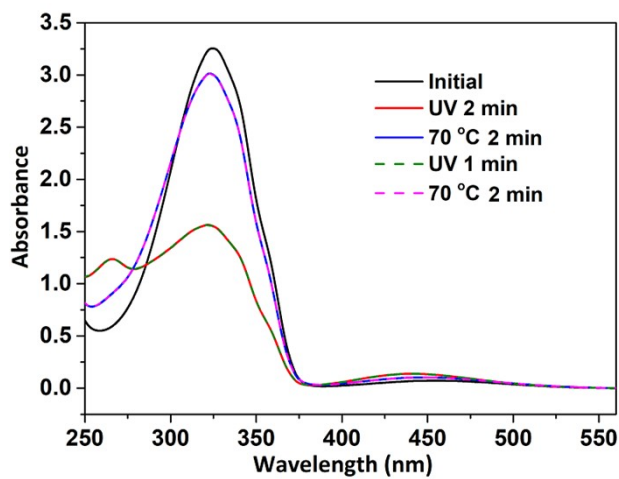

**Figure S5** UV/vis absorption spectra of  $\text{P}(\text{Azo-N-EO}_2\text{MA})_{35}$  in THF solution (0.1 mg/mL) under UV/heating.

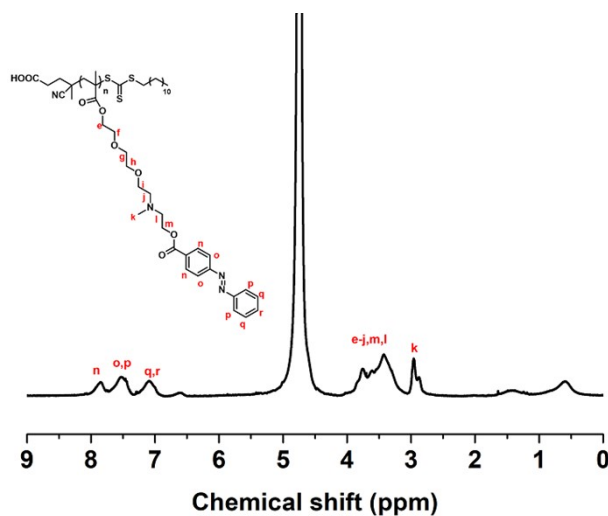

**Figure S6**  $^1\text{H}$  NMR spectra of  $\text{P}(\text{Azo-N-EO}_2\text{MA})_{35}$  in  $\text{D}_2\text{O}$  ( $C = 5 \text{ mg/mL}$ ,  $\text{pH} = 4$ ).

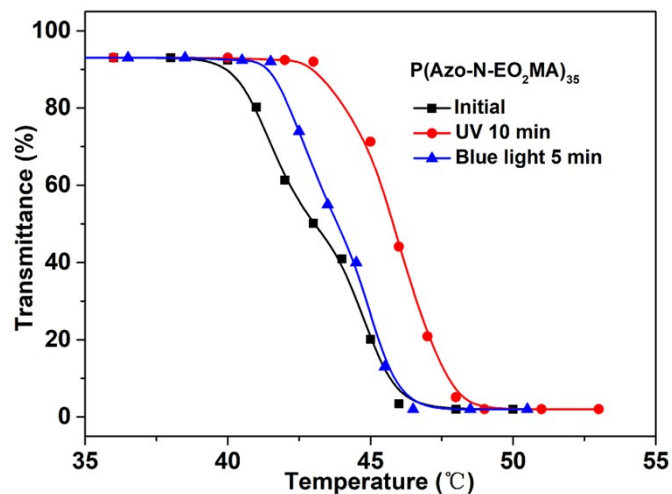

**Figure S7** The effect of the irradiation of UV/blue light on the LCST of P(Azo-N-EO<sub>2</sub>MA)<sub>35</sub>.

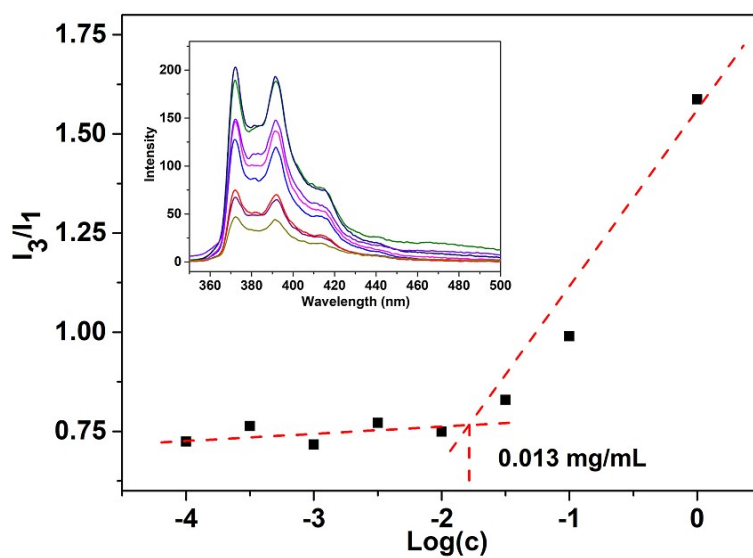

**Figure S8** Fluorescence spectra of P(Azo-N-EO<sub>2</sub>MA)<sub>35</sub> in water with pyrene and plots of  $I_3/I_1$  vs concentration for P(Azo-N-EO<sub>2</sub>MA)<sub>35</sub> in deionized water with different concentrations (from 0.0001 to 1 mg/mL).

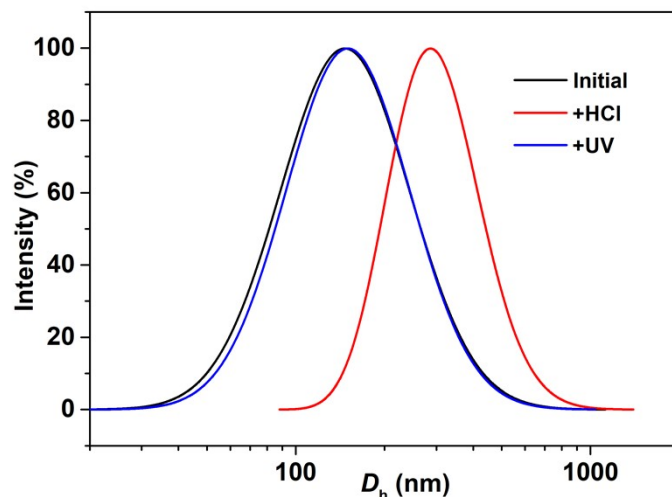

**Figure S9** The  $D_h$  of micelles of P(Azo-N-EO<sub>2</sub>MA)<sub>35</sub>, after treated with HCl and after irradiation of UV.

**Table S1.** Summary of LCST-type CP (°C), UCST-type CP (°C) and Critical pH of homopolymers.

|                                           | pH=3           |                | pH=5<br>(LCST, °C) |    |                | pH=7 |   | BuOH/H <sub>2</sub> O<br>(UCST, °C) |    |    | Critical pH |     |      |
|-------------------------------------------|----------------|----------------|--------------------|----|----------------|------|---|-------------------------------------|----|----|-------------|-----|------|
|                                           | A <sub>a</sub> | U <sup>b</sup> | A                  | U  | B <sup>c</sup> | A    | U | A                                   | U  | B  | A           | U   | B    |
| P(Azo-N-EO <sub>2</sub> MA) <sub>35</sub> | S <sup>d</sup> | S              | 43                 | 46 | 43.5           | I    | I | 34                                  | 25 | 32 | 4.65        | 5.0 | 4.73 |
| P(Azo-N-EOMA) <sub>33</sub>               | S              | S              | 38                 | 42 | 38.5           | I    | I | 66                                  | 56 | 63 | 3.8         | 4.2 | 3.9  |
| P(Azo-N-MA) <sub>35</sub>                 | I <sup>e</sup> | I              | I                  | I  | I              | I    | I | I                                   | I  | I  | I           | I   | I    |

<sup>a</sup>A is the initial state of the solution; <sup>b</sup>U is the solution under UV radiation for 10 min; <sup>c</sup>B is the solution under blue light radiation for 5 min; <sup>d</sup>S represents the sample being soluble; <sup>e</sup>I represents the sample being insoluble.
